# Supplementary material
Source: Research Square preprint supplement (doi:10.21203/rs.3.rs-7268223/v1)
Supplement: Supplementary file 1 [file 128d4617b07df9e43accc092.docx]

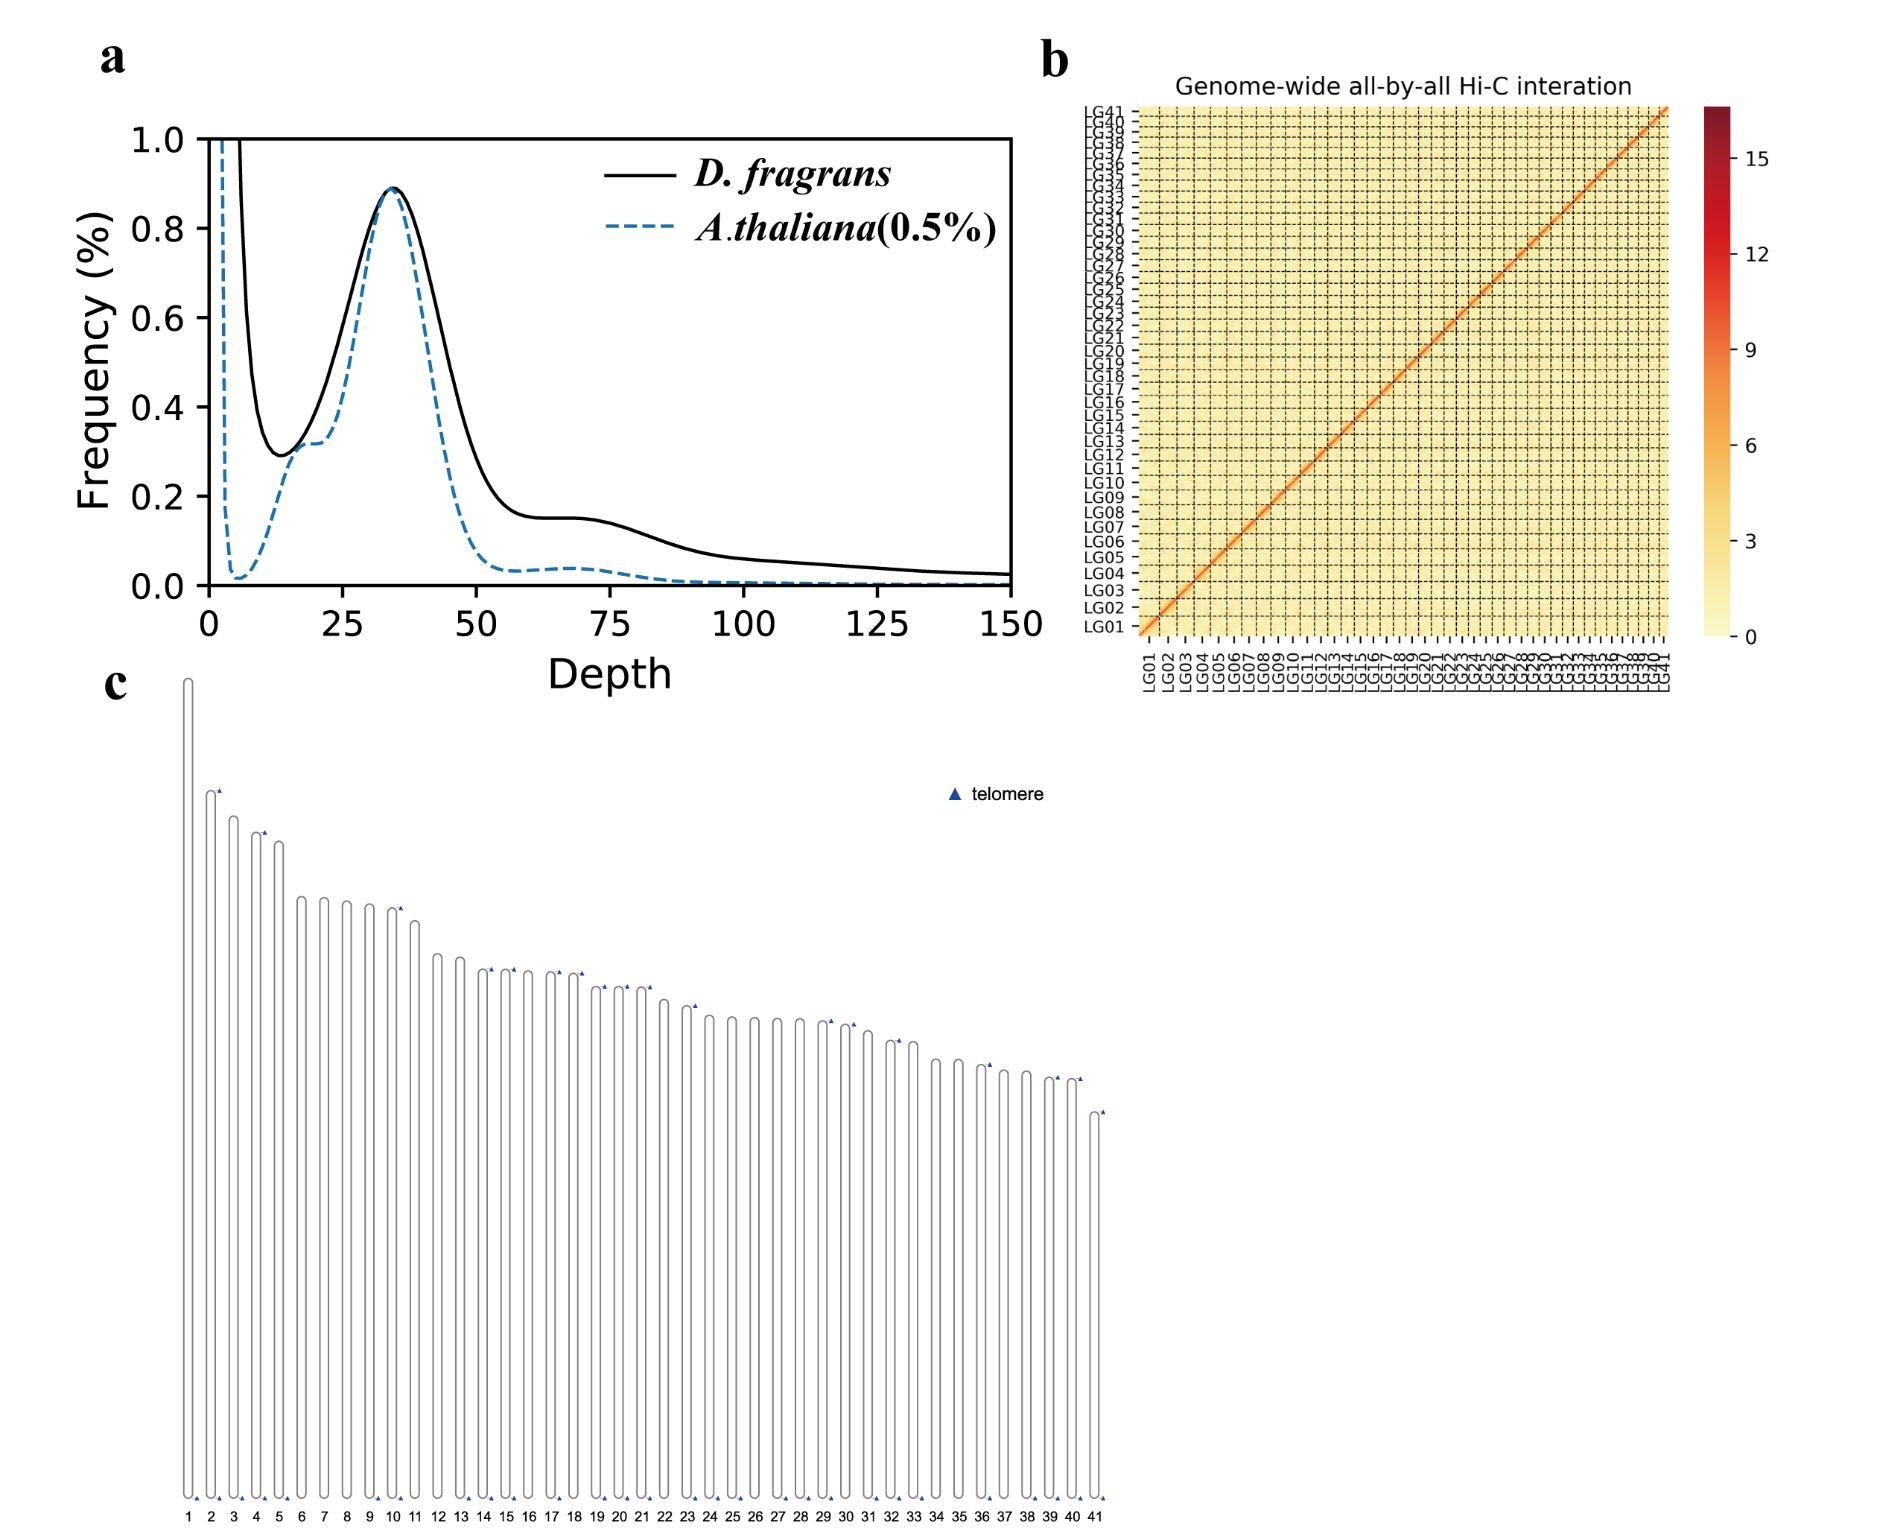


**Fig S1. The genome assembly of *D. fragrans*.**

**a**. Genome survey by Illumina reads; the blue dashed line indicates the A. thaliana genome survey with a heterozygosity rate of 0.5%. **b**. Hi-C heatmap. **c.** Telomere prediction results.


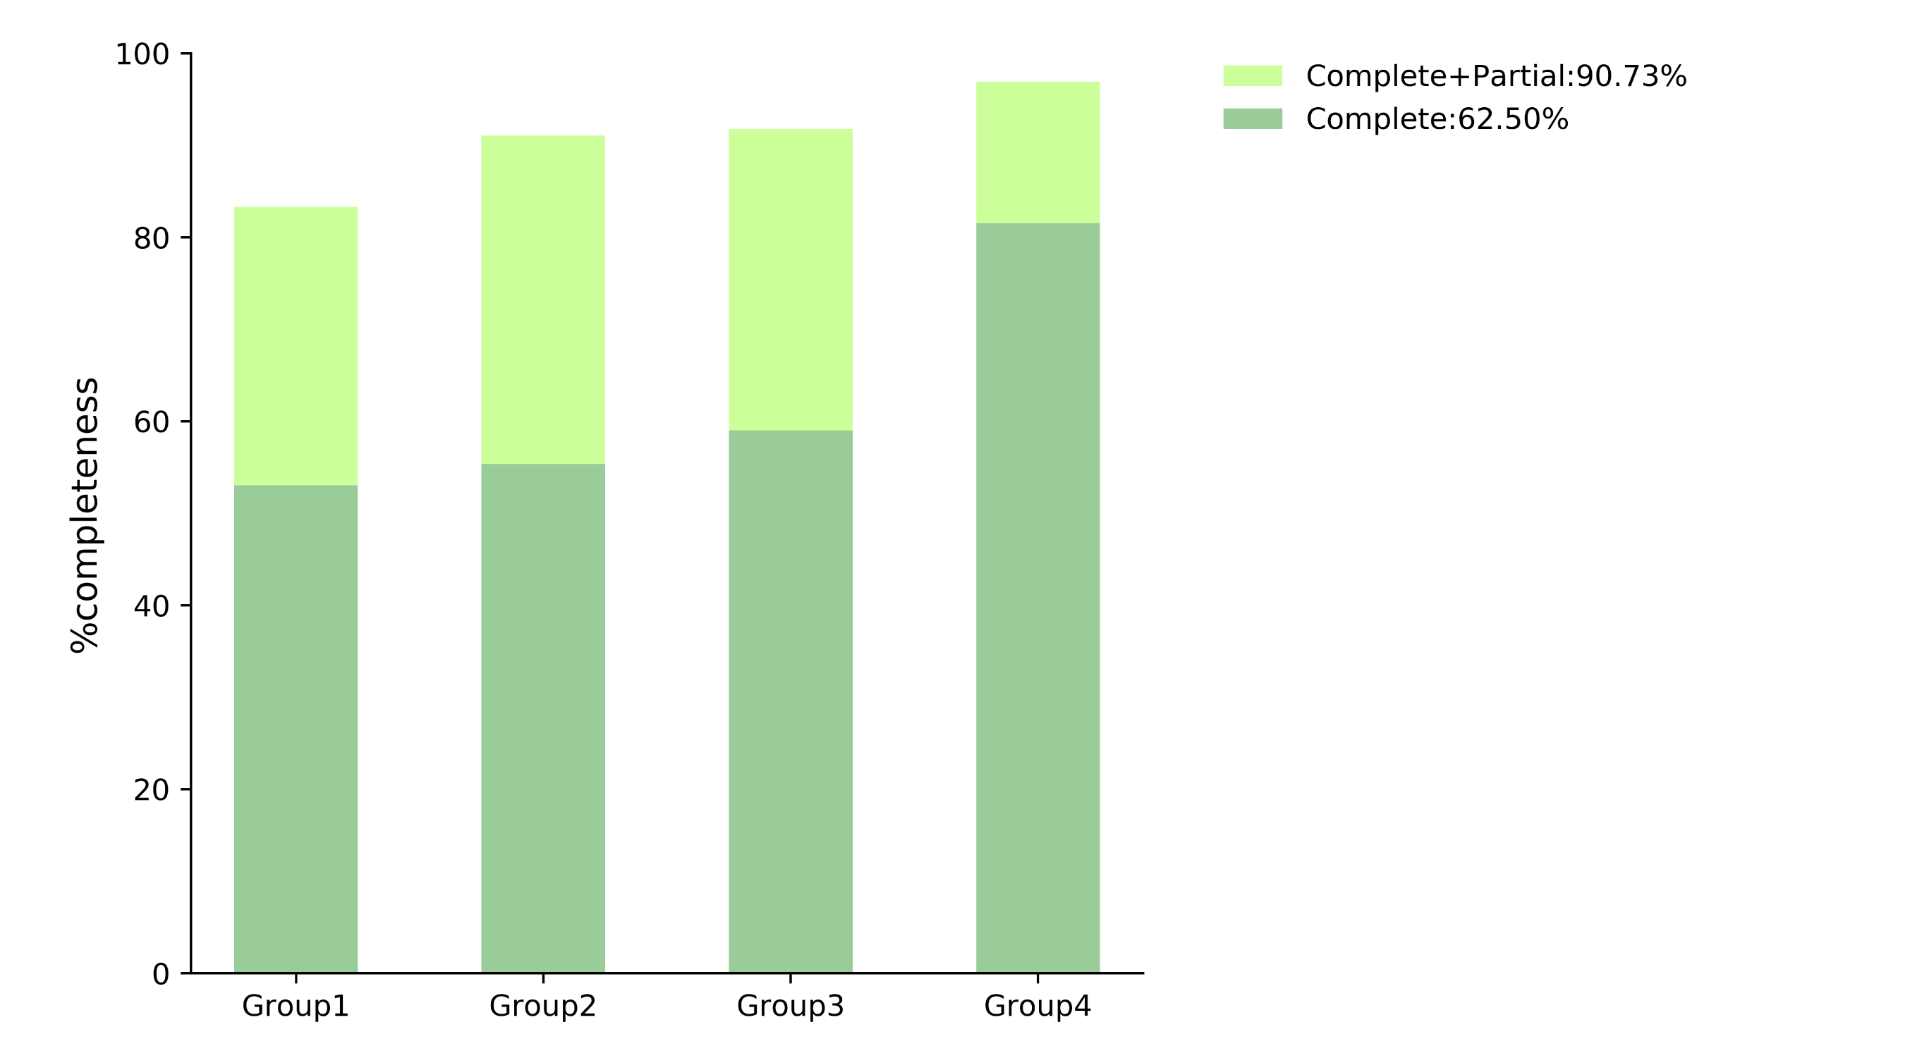


**Fig S2. CEGMA evaluation of *D. fragrans* genome.**

**
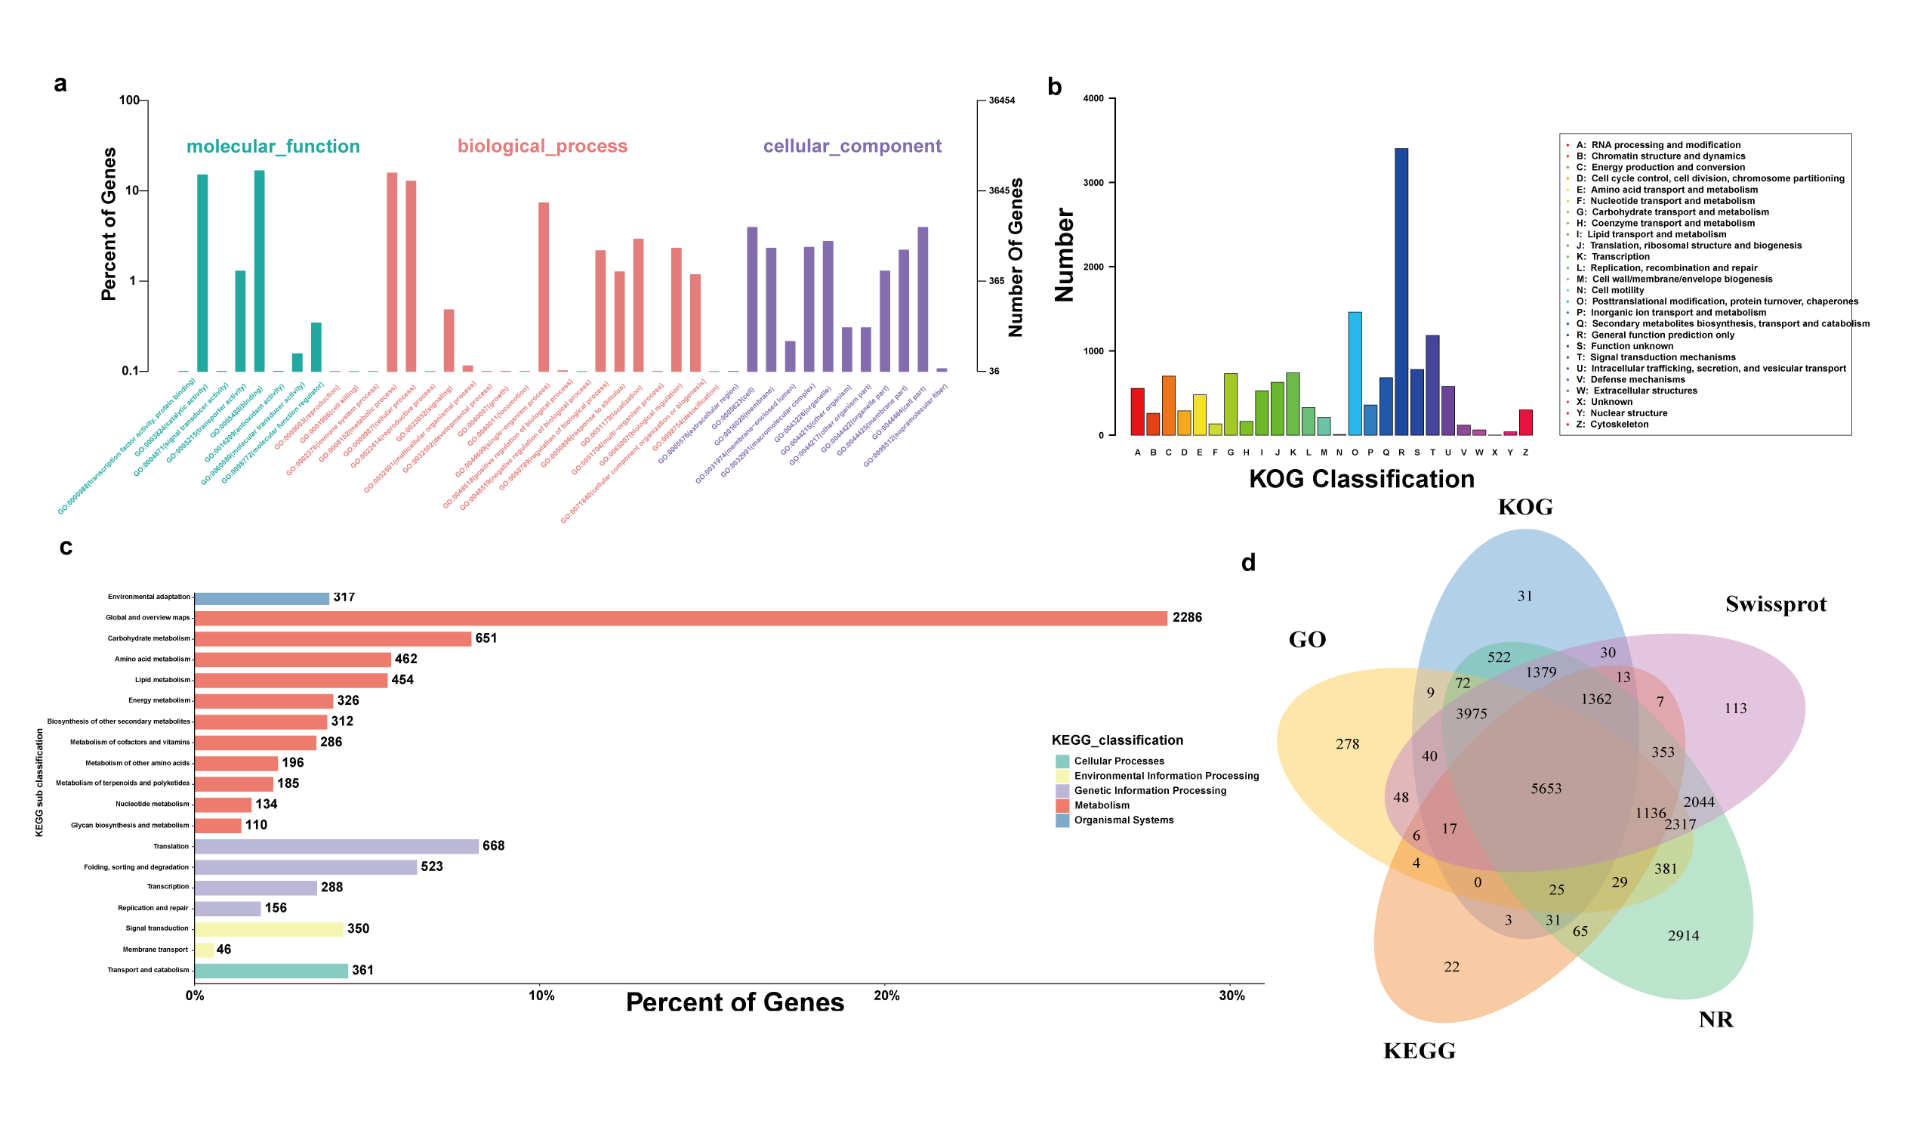
**

**Fig S3. Functional annotation of the *D. fragrans* genome.**

**a**. GO database annotation results. **b**. KOG database annotation results. **c**. KEGG database annotation results. **d**. Venn diagram of functional annotations.


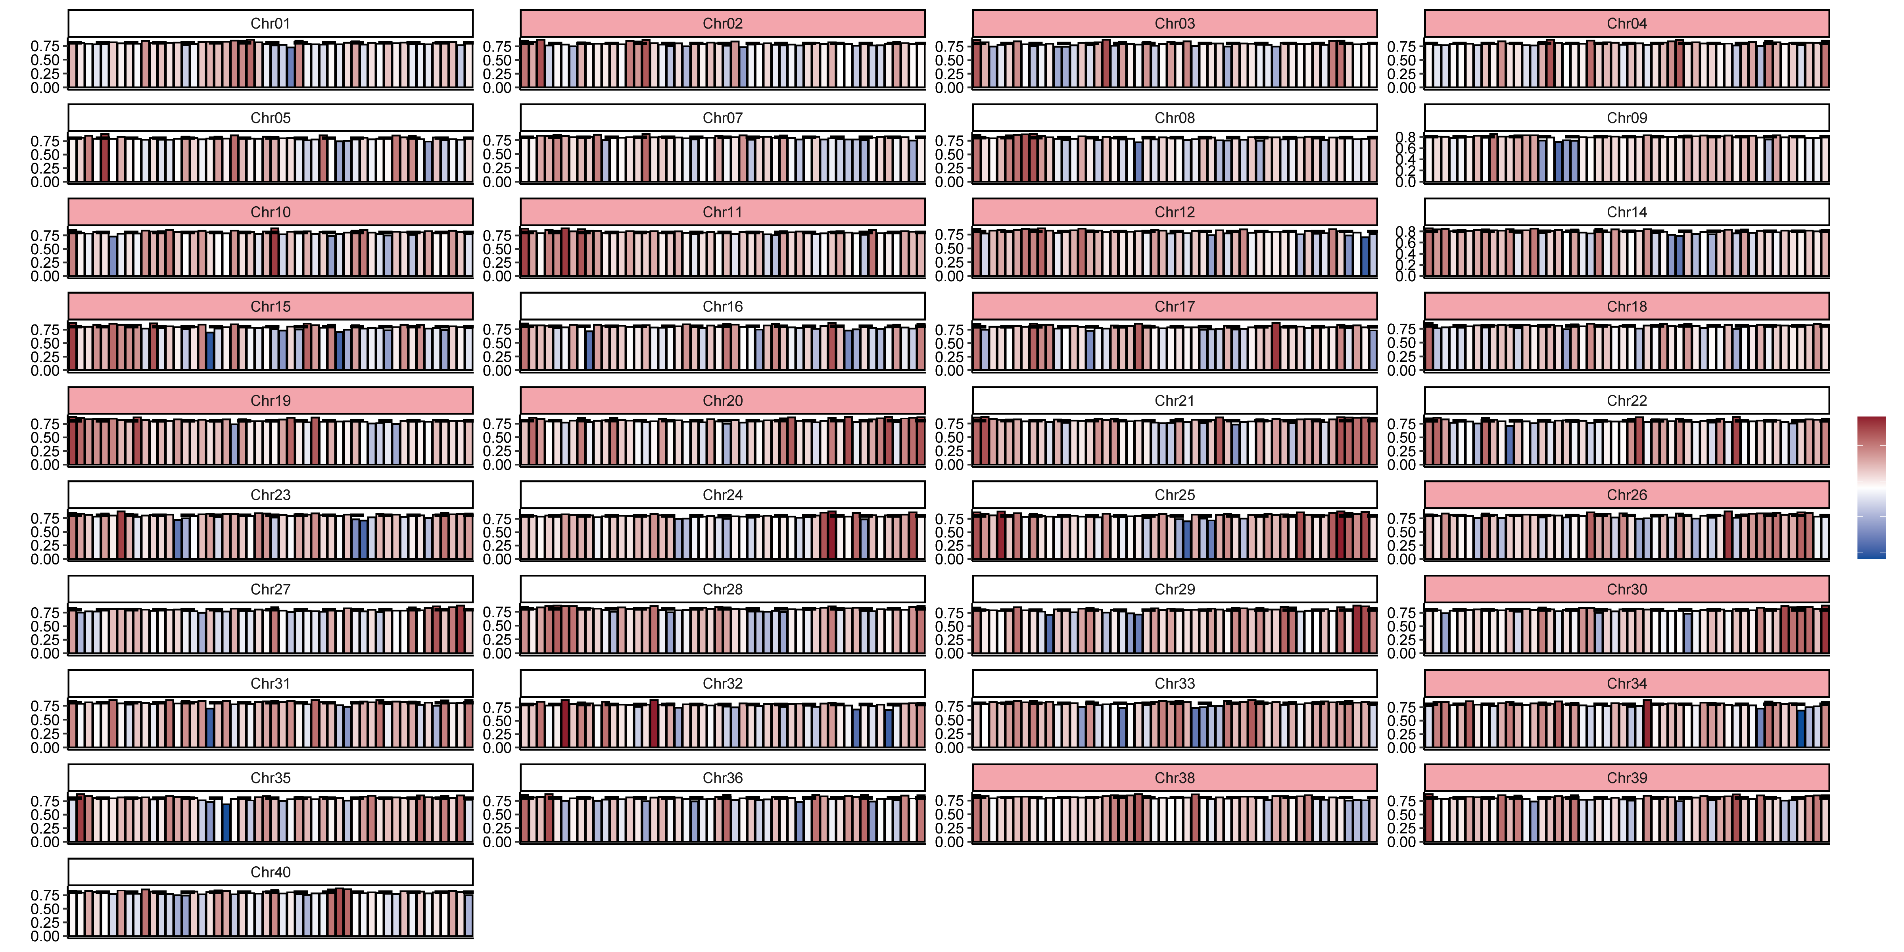


**Fig S4. Distribution of repetitive sequences on chromosomes.**

**
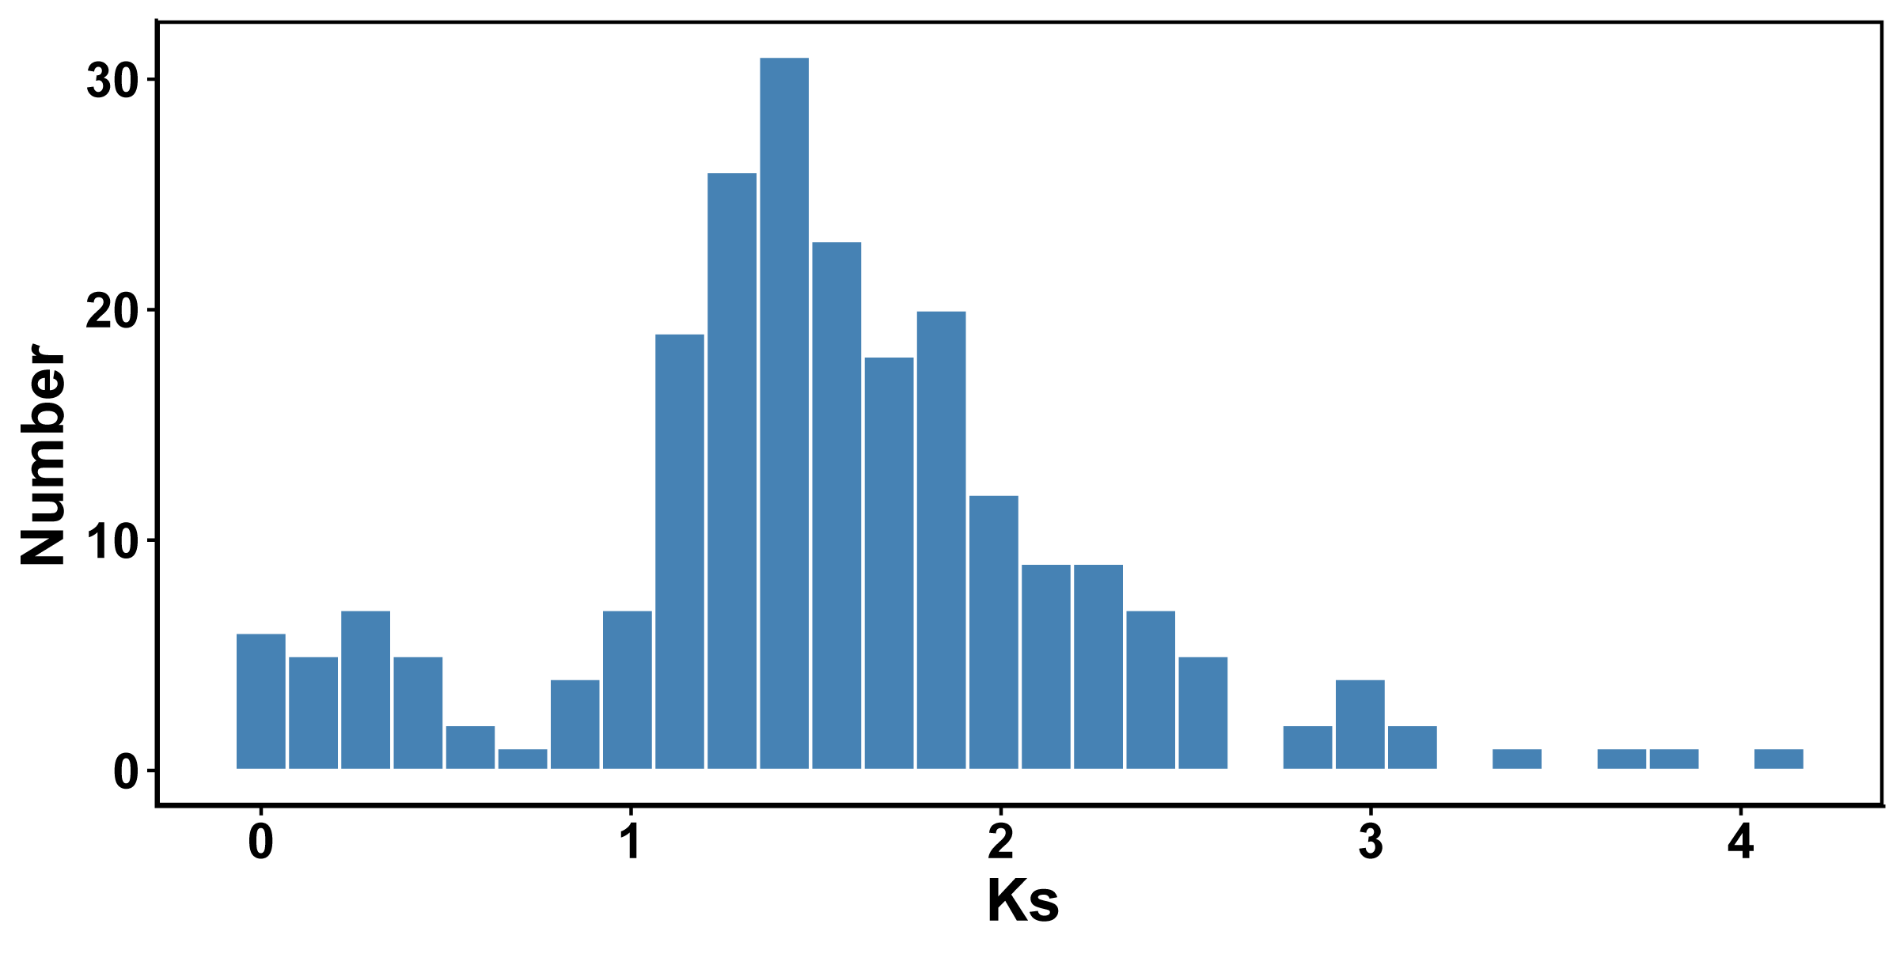
**

**Fig S5. Ks distribution of collinear gene pairs.**


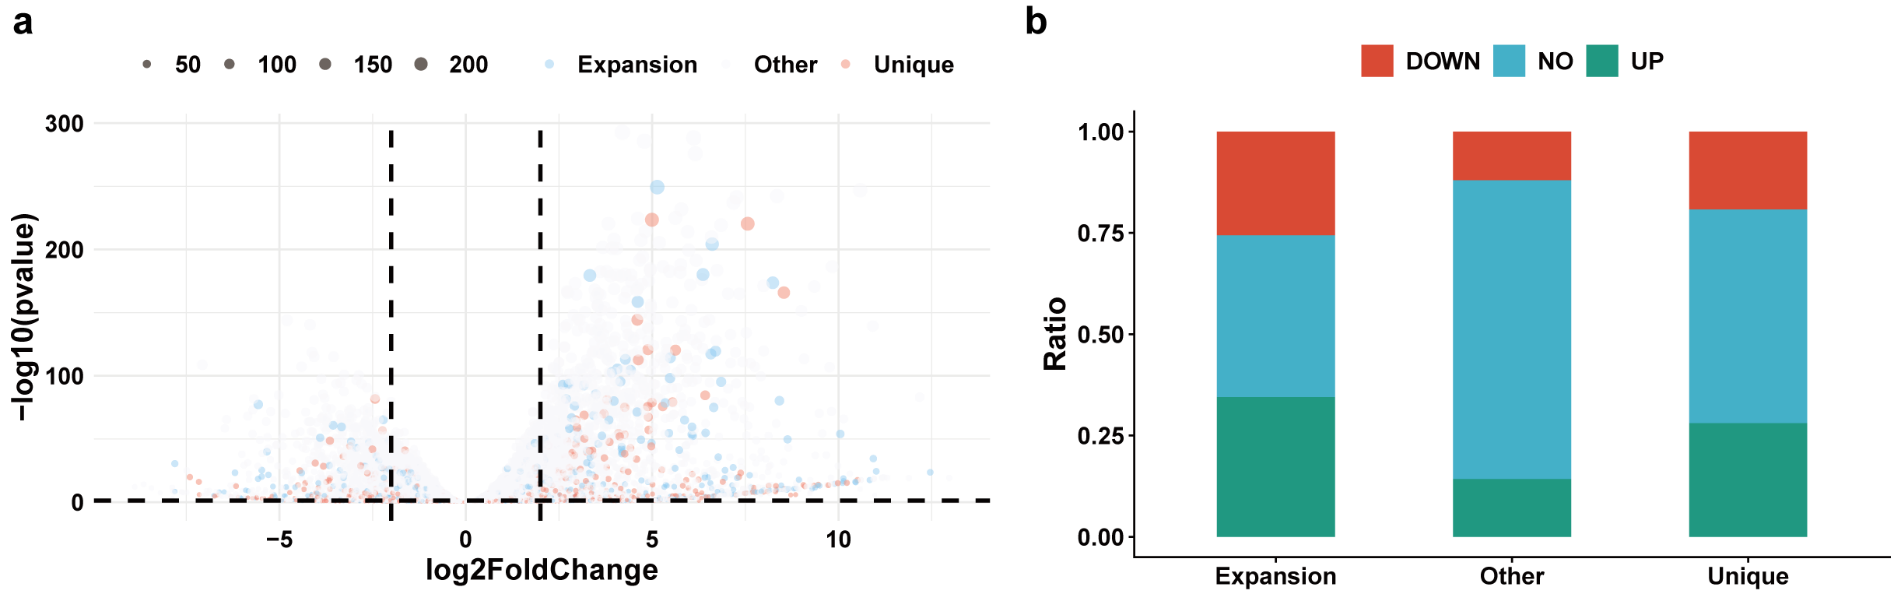


**Fig S6. Expression responses of expanded and unique gene families to UV treatment.**

**a.** Volcano plots showing expression differences of expanded and unique gene families under UV treatment. **b.** Proportion of UV-responsive genes in expanded and unique gene families.


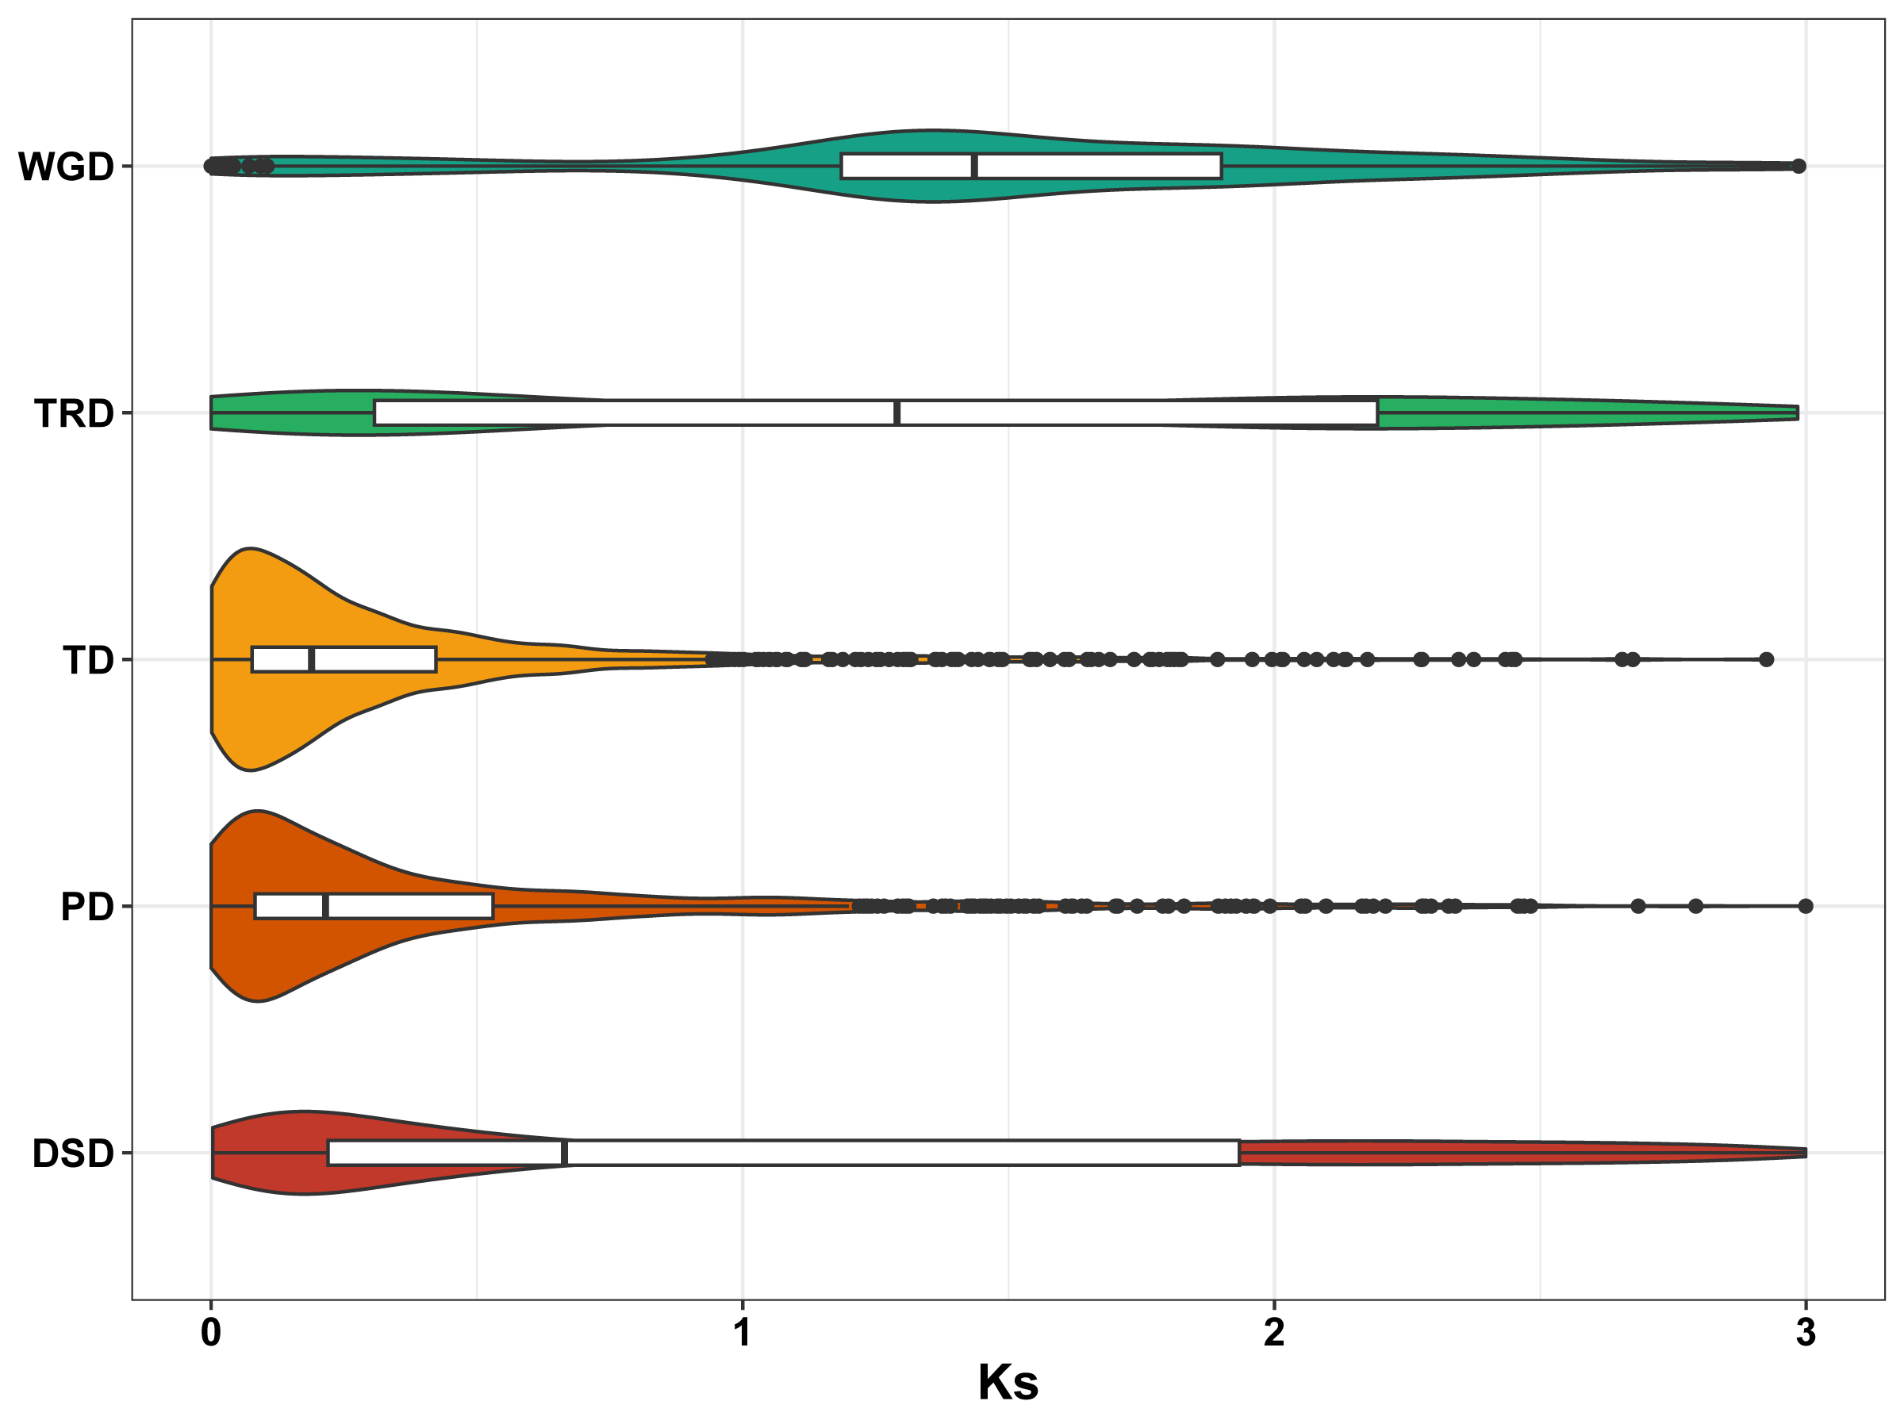


**Fig S7. Ks distribution of genes across different replication categories.**


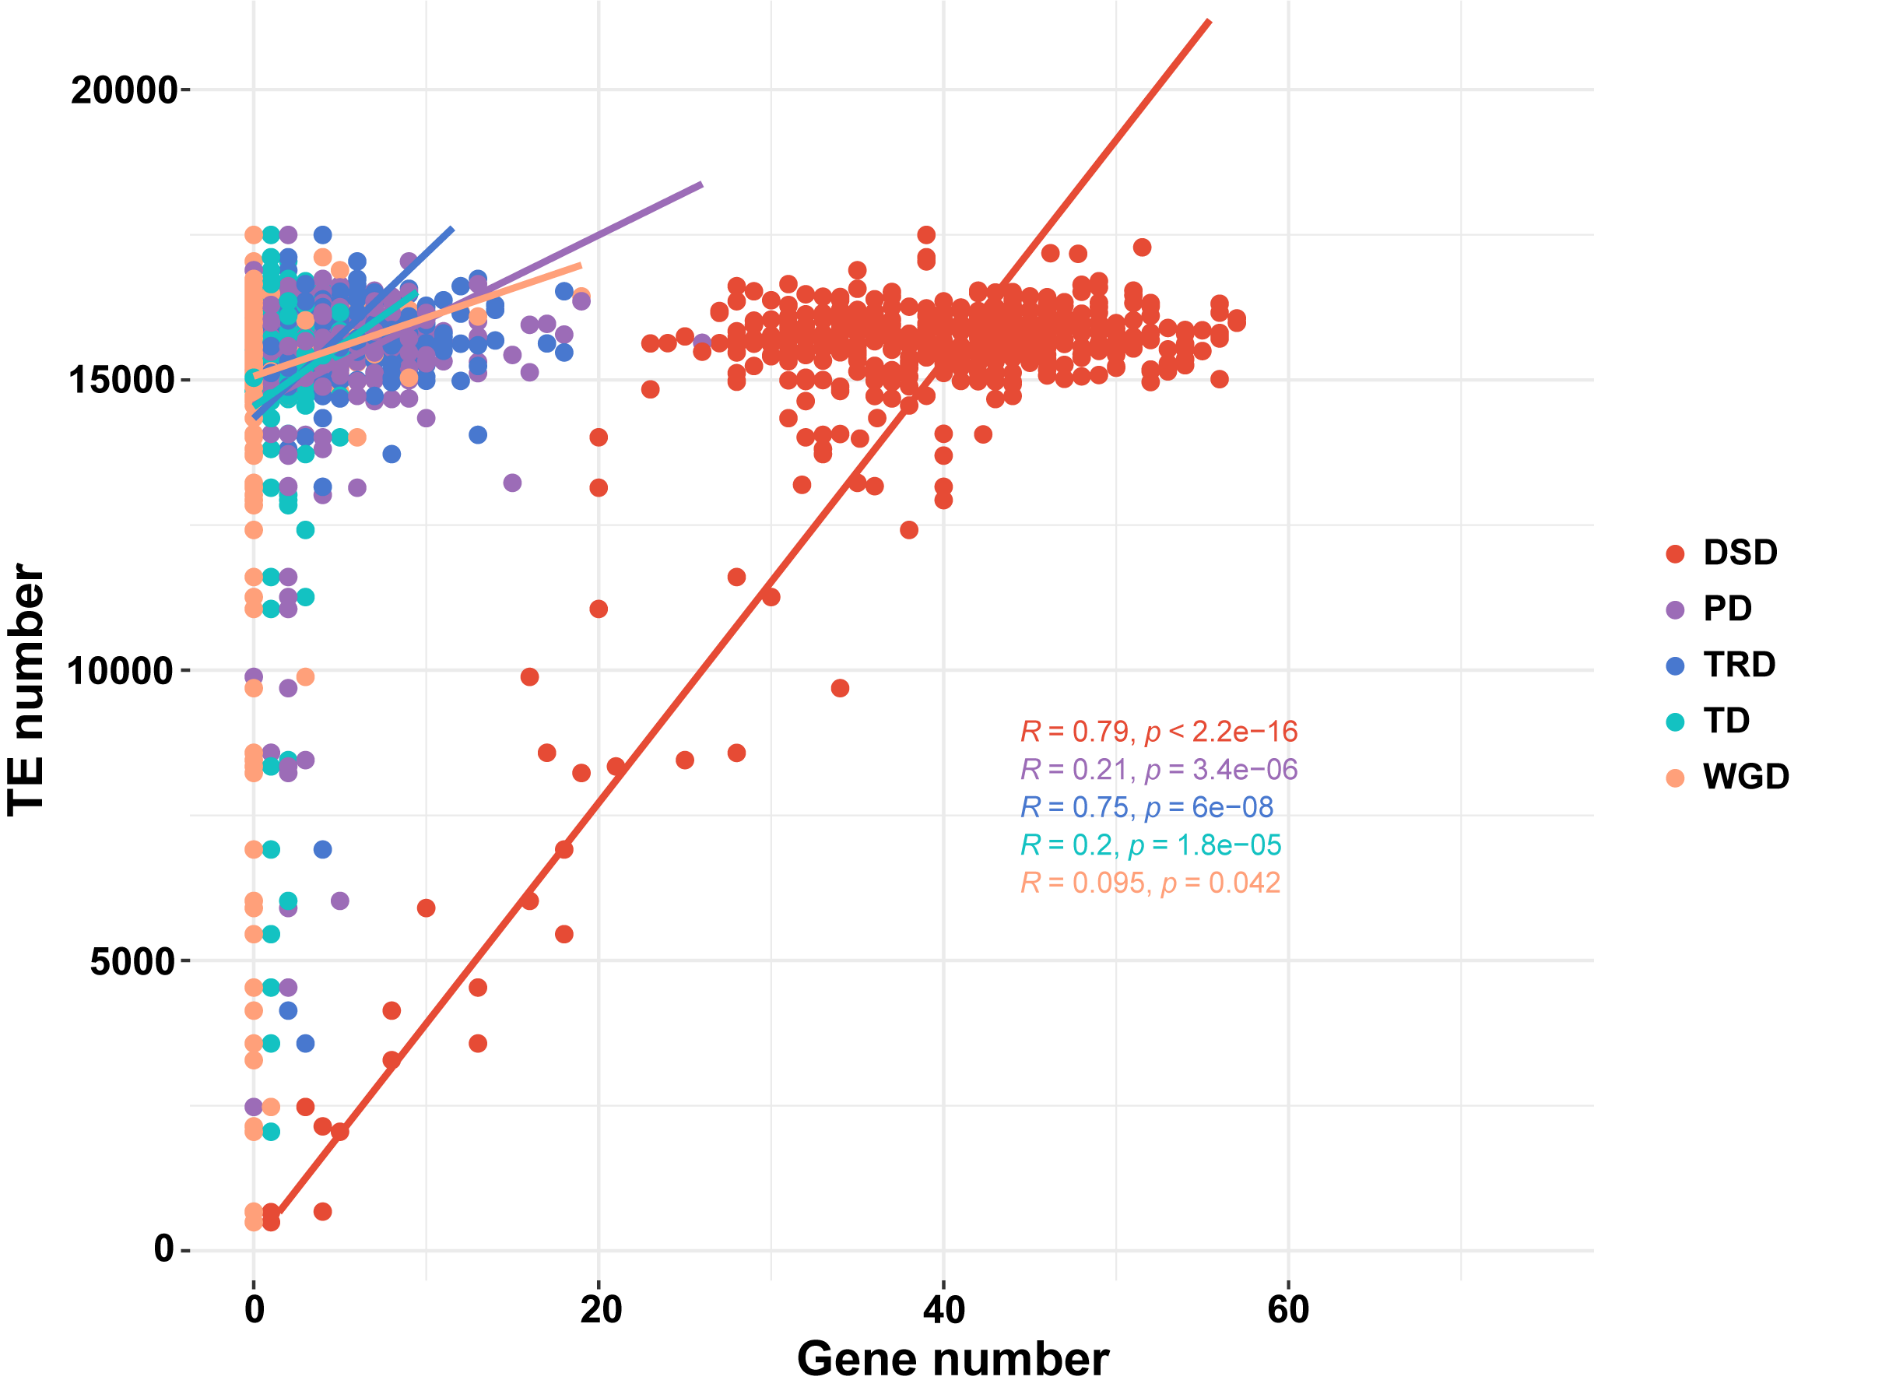


**Fig S8. Genome-wide correlation between the number of genes with different duplication types and TE counts.**


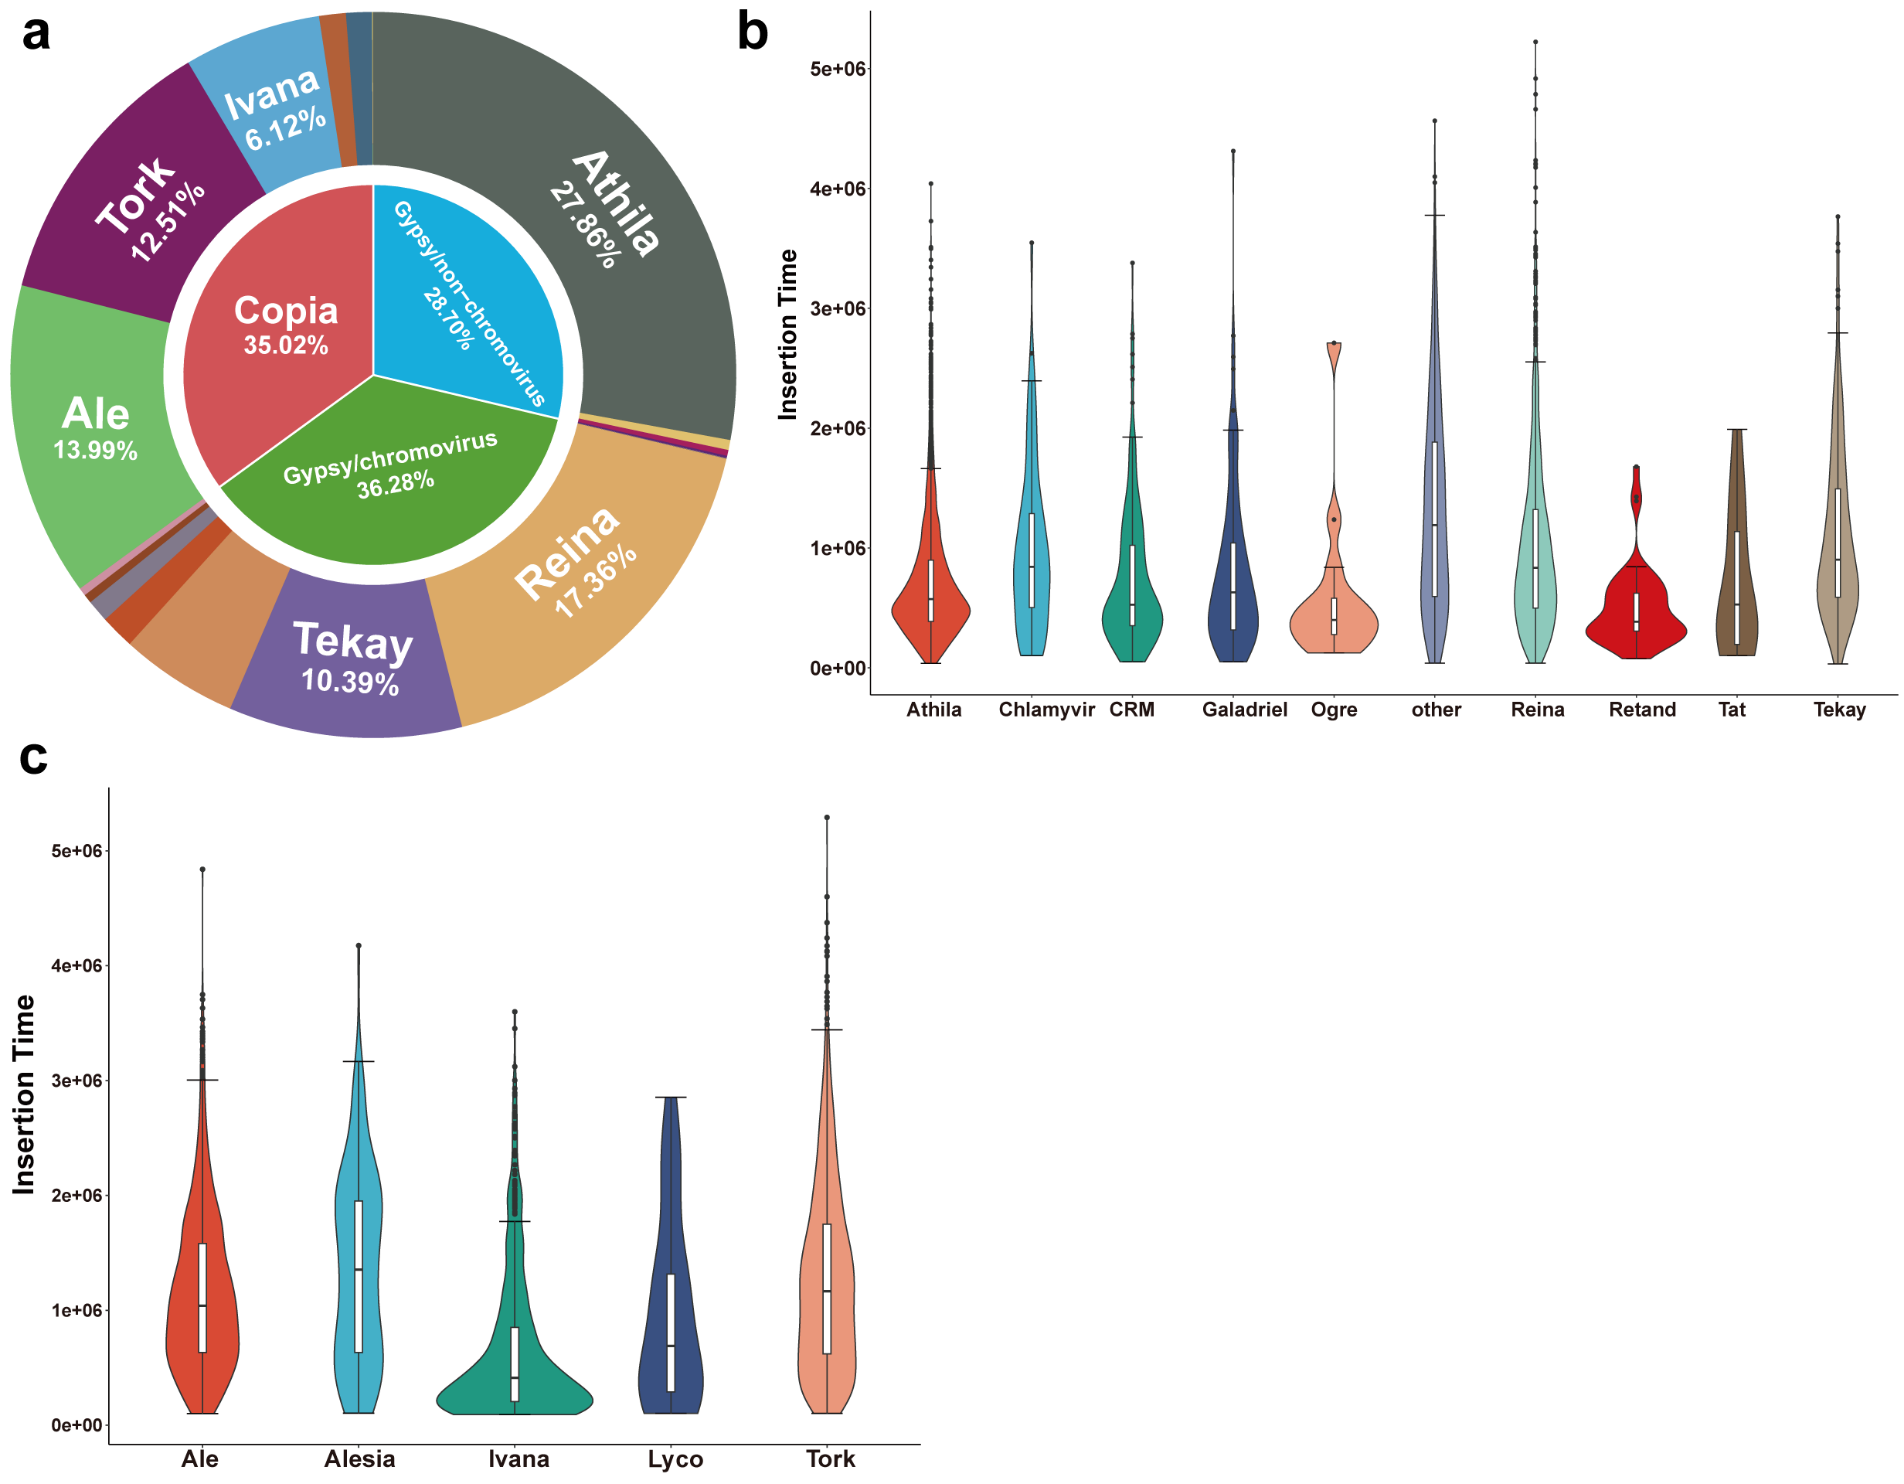


**Fig S9. LTR classification and insertion time calculation.**

**a.** Distribution of LTR and its subfamily content. **b.** Insertion time statistics for Gypsy subfamilies. **c.** Insertion time statistics for Copia subfamilies.


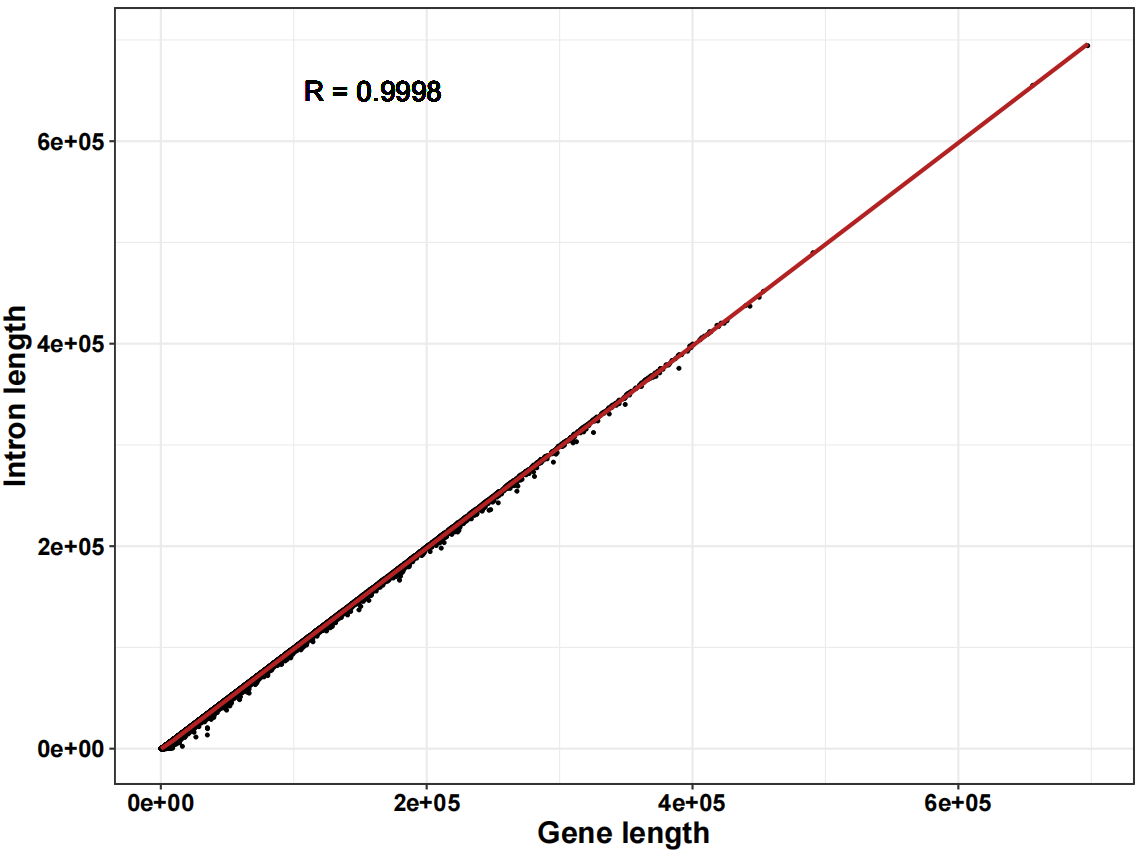


**Fig S10. Correlation between gene length and intron lengths.**


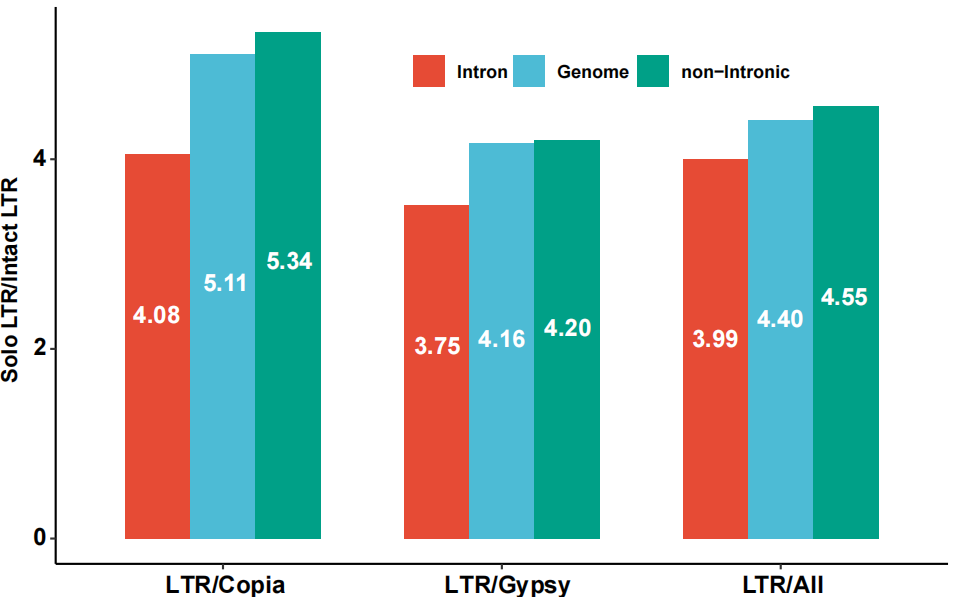


**Fig S11. Ratio of Solo LTRs to Intact LTRs in different regions of the genome.**


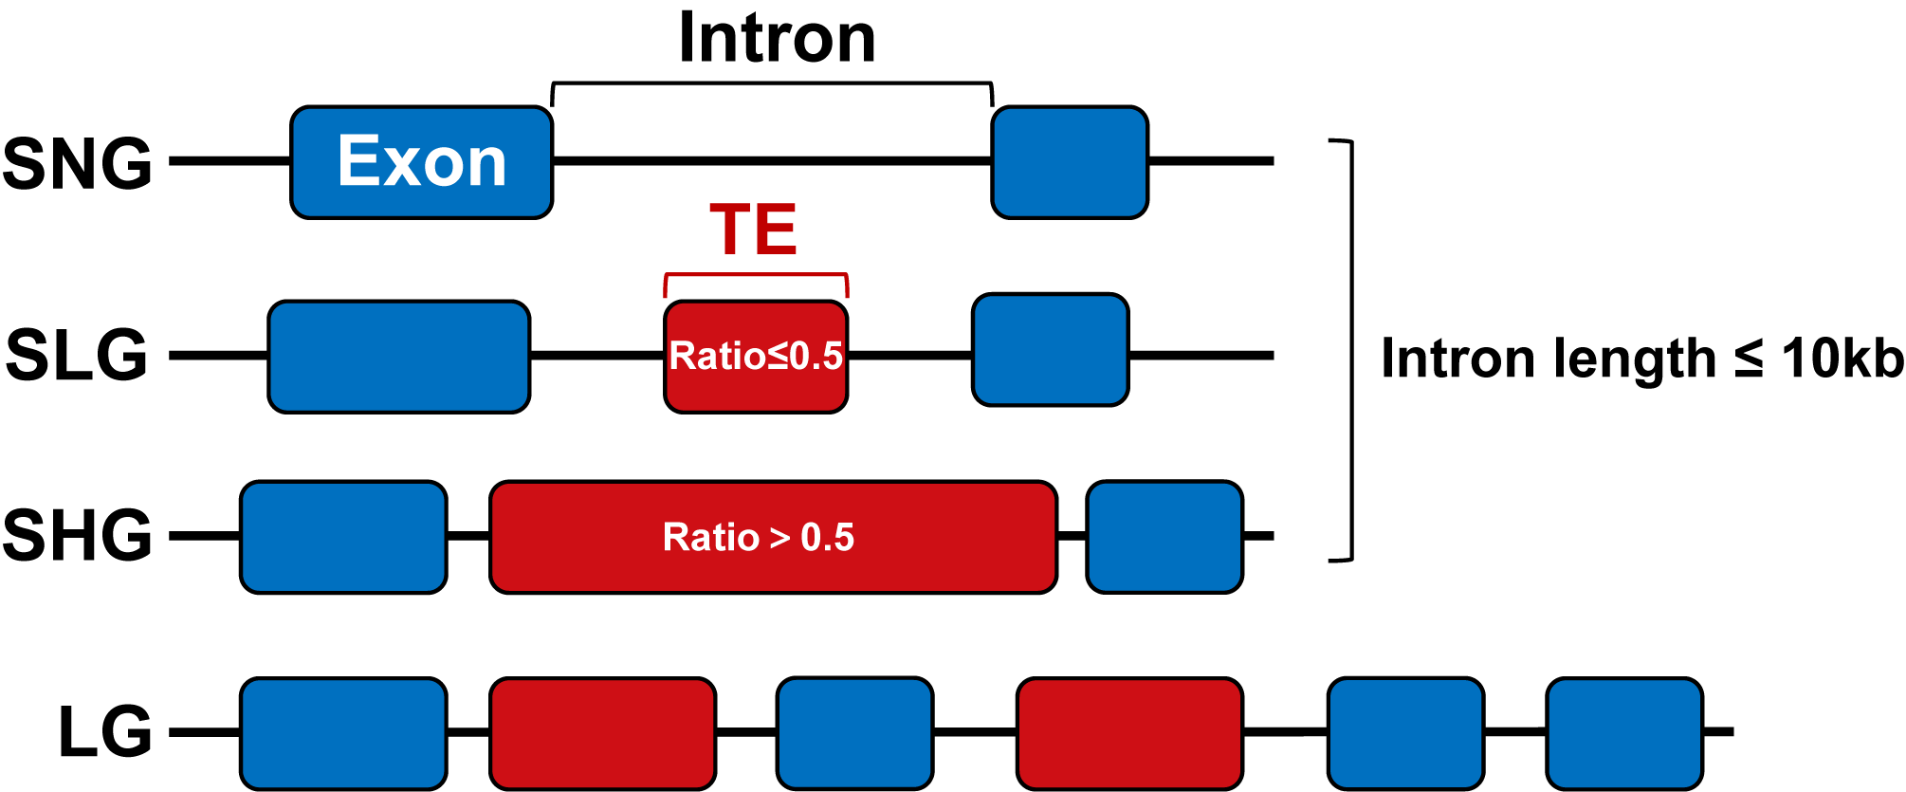


**Fig S12. Schematic diagram of the four gene categories classified based on TE insertion proportion relative to intron length and intron length.**

**
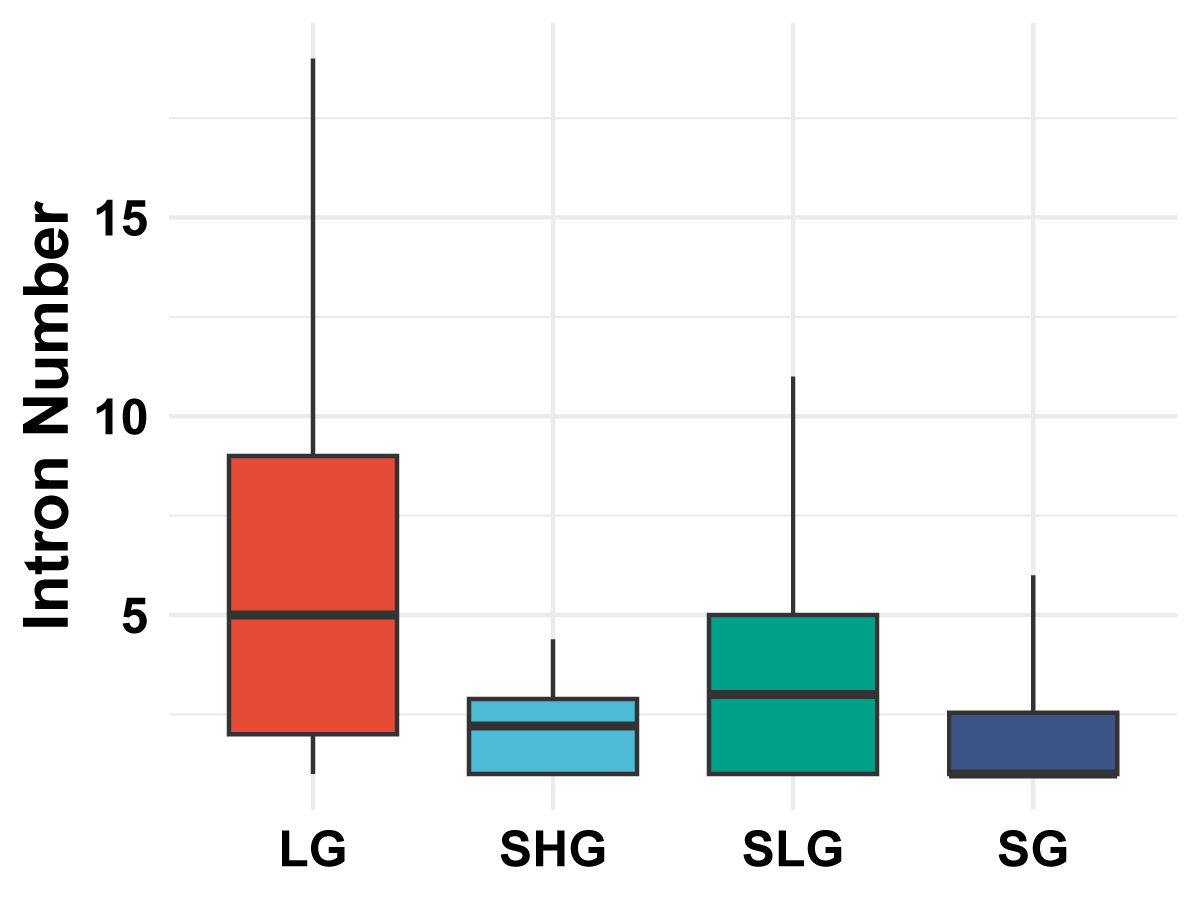
**

**Fig S13. Statistics of intron number in genes.**


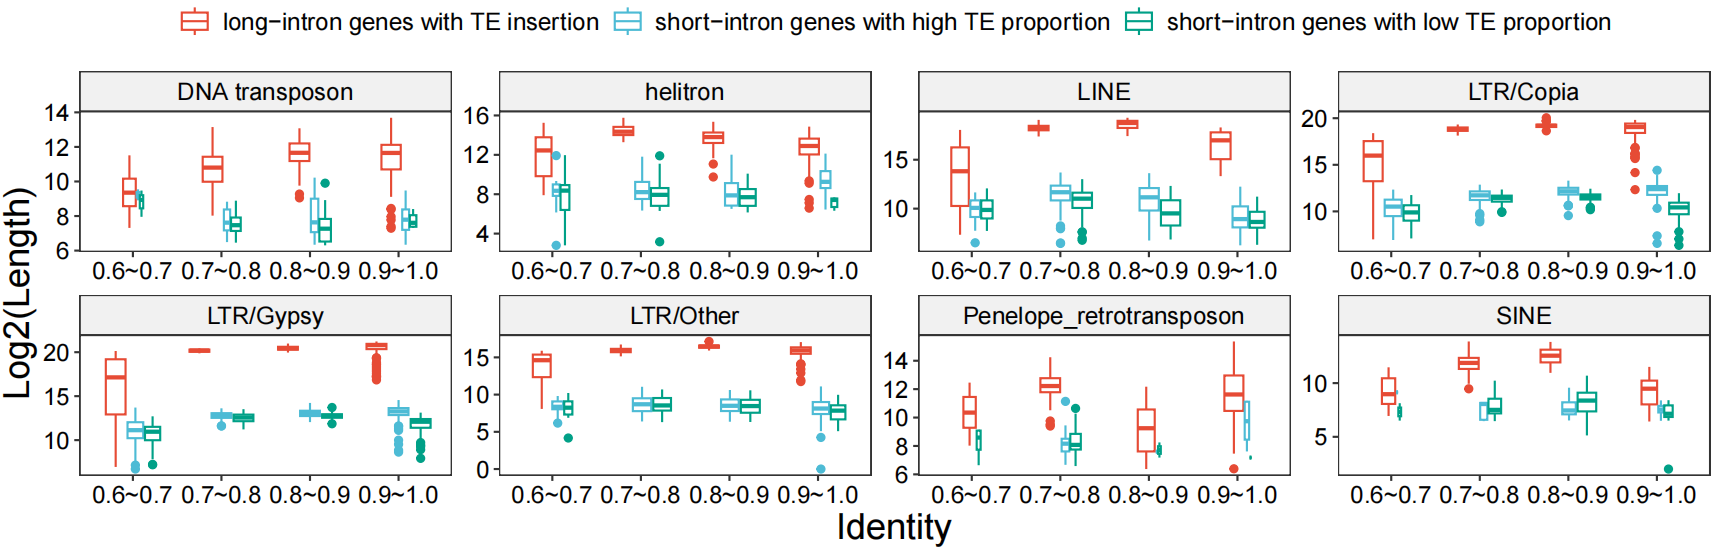


**Fig S14. Statistical analysis of insertion lengths of different TEs across various identity ranges in diverse gene categories.**


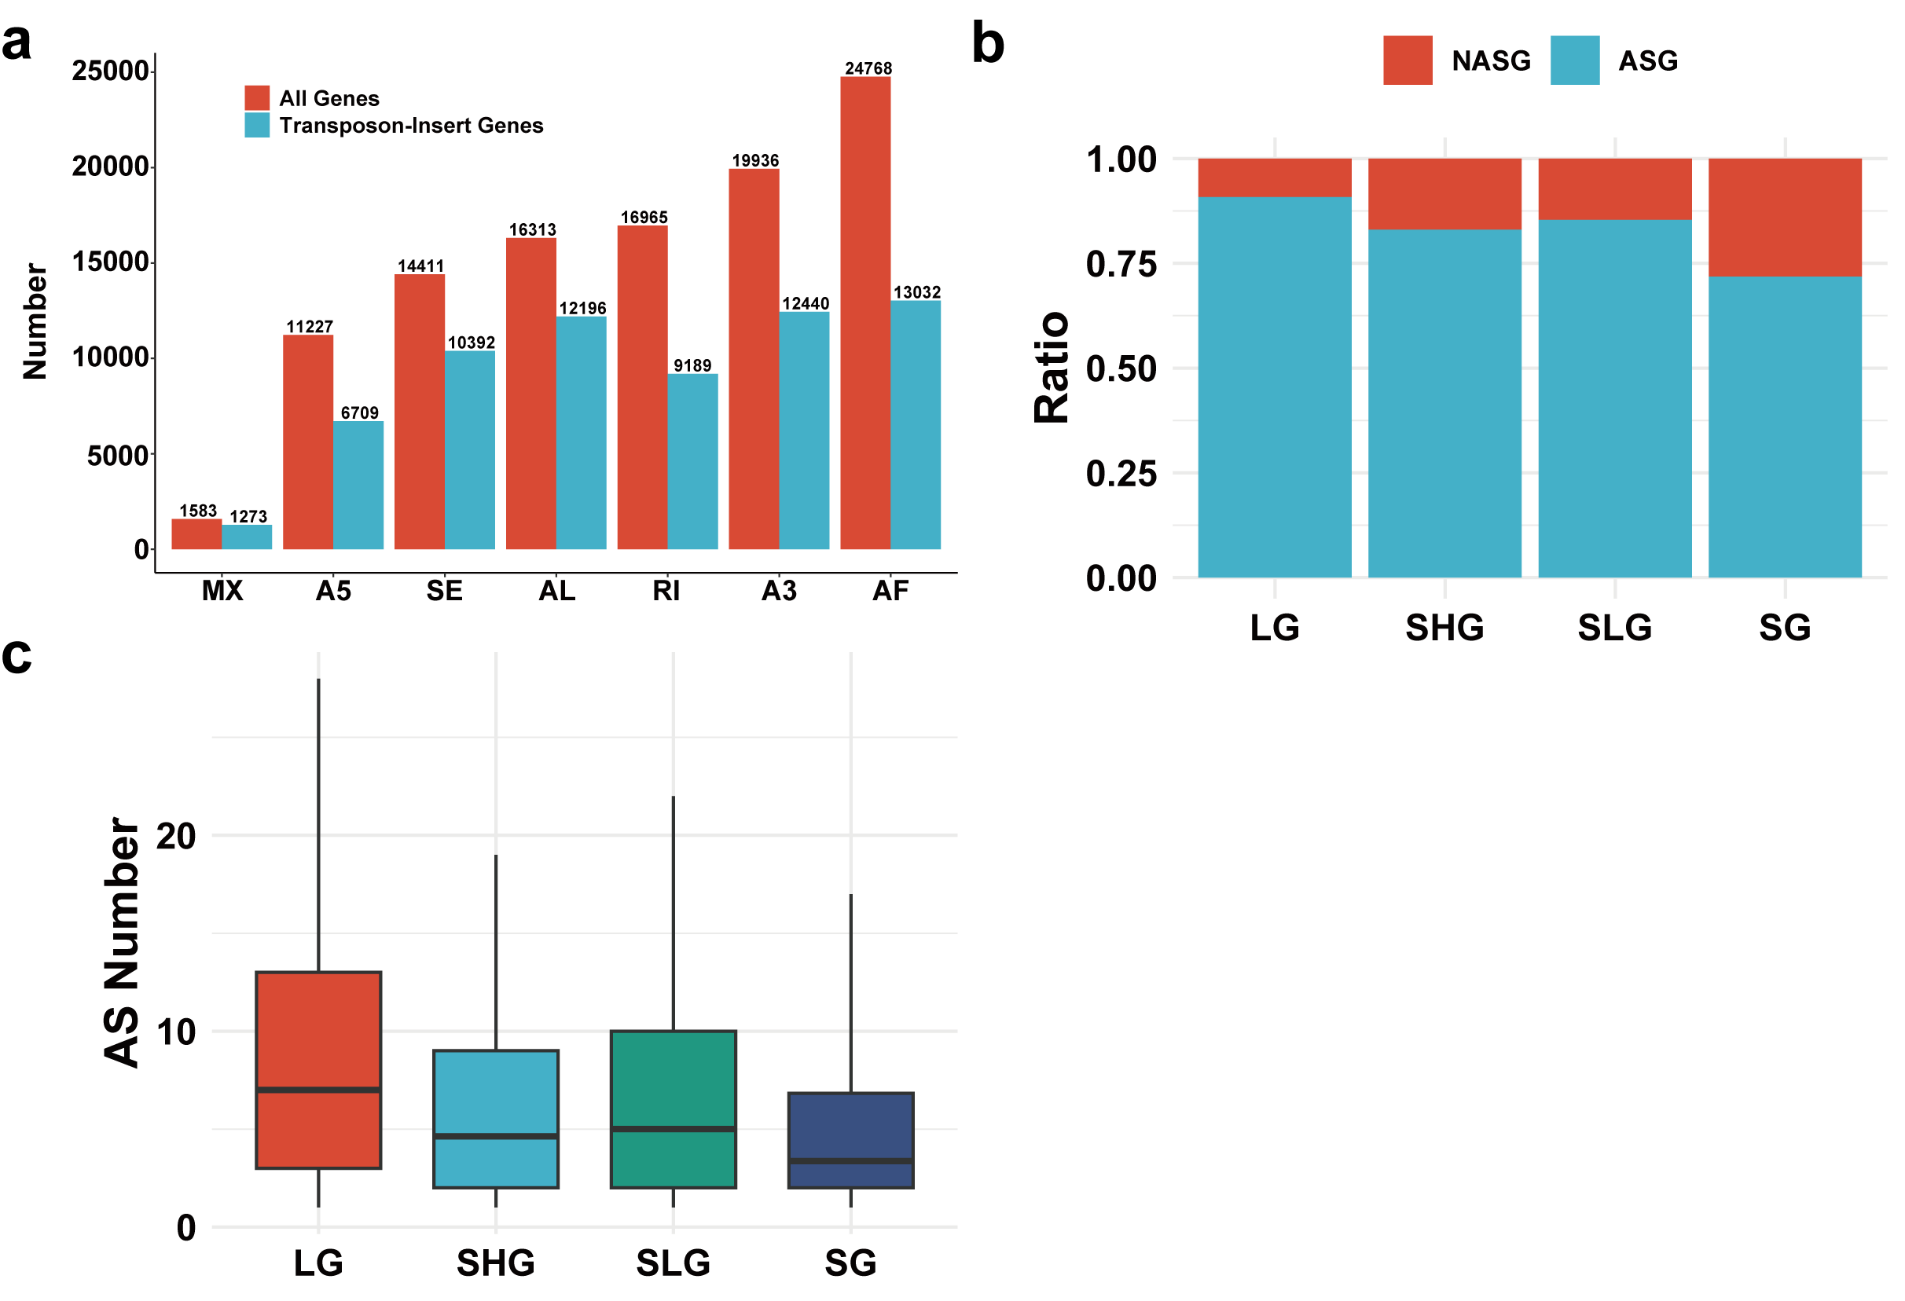


**Fig S15. Influence of TE insertions on alternative splicing of genes.**

**a.** Statistical analysis of the number of various AS events in TE-inserted and non-TE-inserted genes. **b.** Proportion of alternative splicing genes (ASGs) and non-alternative splicing genes (NASGs) across different gene categories. **c.** Statistics of the number of alternative splicing events across different gene categories.
