# Supplementary material
Source: Research Square preprint supplement (doi:10.21203/rs.3.rs-7268223/v1)
Supplement: Supplementary file 2 [file 6d299a80b4e2e6b36153f265.xlsx]

## Sheet: Supplementary Table 1
Supplementary Table 1: Statistics of Third-Generation Sequencing Data
Library ID	Total pass reads bases / bp	Total pass reads number	Pass reads mean length / bp	Pass reads max length / bp	Pass reads N50 length /bp	>10kb_ratio	>20kb_ratio	>40kb_ratio
20210726-NPL3541-P4-PAG29114	93534438142	5353313	17472	208151	22401	75.65	37.93	2.08
20210730-NPL3541-P4-PAH69284	101874748024	5677361	17944	202901	22613	76.97	39.82	2.23
20210810-NPL3541-P4-PAG95309	122580955437	8093587	15145	166150	21672	63.35	31.19	1.72
20210813-NPL3541-P4-PAG96680	41632393900	2293309	18153	154971	22643	78.47	39.77	2.41
20210814-NPL3541-P4-PAG96680	8100469913	437944	18496	168795	23035	79.4	41.51	2.49
Total	367723005416	21855514	16825	208151	22265	71.81	36.19	2.03

## Sheet: Supplementary Table 2
Supplementary Table 2: Statistics of Second-Generation Sequencing Data
Total reads	Total bases	Clean reads	Clean bases	Q20 rate(%)	Q30 rate(%)	GC (%)
1770265524	265539828600	1.764,733,016	246692551390	96.62	90.2	42.58

## Sheet: Supplementary Table 3
Supplementary Table 3: Hi-C scaffolding statistics
Chr	Size(bp)
Chr01	168838922
Chr02	145735238
Chr03	140483285
Chr04	137124176
Chr05	135288908
Chr06	123896846
Chr07	123684040
Chr08	122984635
Chr09	122384941
Chr10	121560185
Chr11	118931421
Chr12	112127134
Chr13	111436924
Chr14	108965684
Chr15	108922016
Chr16	108596432
Chr17	108406198
Chr18	108115259
Chr19	105385745
Chr20	105382167
Chr21	105263473
Chr22	102712107
Chr23	101425566
Chr24	99465042
Chr25	99101469
Chr26	98983889
Chr27	98809515
Chr28	98732582
Chr29	98315066
Chr30	97614099
Chr31	96280190
Chr32	94293172
Chr33	94037815
Chr34	90417657
Chr35	90359646
Chr36	89311424
Chr37	88180015
Chr38	87967189
Chr39	86691790
Chr40	86412718
Chr41	79555488
Total anchored length	4422180068
Unanchored length	29598183
Total length	4451778251

## Sheet: Supplementary Table 4
Supplementary Table 4:Telomere Prediction Results
Chrid	chrlen	status	leftnum	leftdirection	rightnum	rightdirection
Chr01	168845322	right	0		201	-
Chr02	145740238	both	532	+	243	-
Chr03	140488985	right	0		486	-
Chr04	137129076	both	592	+	365	-
Chr05	135293608	right	0		506	-
Chr06	123901946	no	0		0
Chr07	123686240	no	0		0
Chr08	122988935	no	0		0
Chr09	122390141	right	0		526	-
Chr10	121563885	both	106	+	633	-
Chr11	118935921	no	0		0
Chr12	112130334	no	0		0
Chr13	111440624	right	0		564	-
Chr14	108969584	both	366	+	528	-
Chr15	108925116	both	432	+	572	-
Chr16	108600532	no	0		0
Chr17	108410298	both	349	+	520	-
Chr18	108118759	left	594	+	0
Chr19	105389045	both	590	+	483	-
Chr20	105385967	both	519	+	618	-
Chr21	105266673	both	175	+	338	-
Chr22	102716107	no	0		0
Chr23	101427766	both	560	+	590	-
Chr24	99468242	right	0		260	-
Chr25	99105869	right	0		462	-
Chr26	98986489	no	0		0
Chr27	98814315	right	0		506	-
Chr28	98735482	right	0		589	-
Chr29	98317666	both	571	+	589	-
Chr30	97617499	left	273	+	0
Chr31	96282890	right	0		528	-
Chr32	94294672	both	342	+	574	-
Chr33	94040615	right	0		550	-
Chr34	90420757	no	0		0
Chr35	90363446	no	0		0
Chr36	89315924	both	152	+	127	-
Chr37	88183415	no	0		0
Chr38	87969389	right	0		528	-
Chr39	86694490	both	133	+	481	-
Chr40	86417018	both	485	+	444	-
Chr41	79557388	both	585	+	486	-

## Sheet: Supplementary Table 5
Supplementary Table 5:Statistics of Protein-Coding Gene Annotations Predicted Based on Genomes of Closely Related Species
Gene set	Total number of genes	Average gene length(bp)	Average CDS length(bp)	Average exons number per gene	Average exon length(bp)	Average intron length(bp)
Selaginella.moellendorffii	100585	23662.2	1505.64	4.35	345.79	6605.6
Salvinia.cucullata	48337	27466.8	1368.76	4.85	282.15	6776.62
O.sativa	62613	21601.4	1251.62	4.19	298.6	6375.94
Azolla.filiculoides	51502	25029.5	1383.85	4.93	280.97	6023.93
A.thaliana	68652	25306.5	1336.27	4.85	275.79	6233.81
Ceratopteris.richardii	101545	14751.2	1180.05	3.62	325.7	5173.69
GeMoMa	38353	20452.1	1158.78	4.22	274.77	5996.69

## Sheet: Supplementary Table 6
Supplementary Table 6:Statistics of Protein-Coding Gene Annotation Based on Transcriptome Data
Gene set	Total number of genes	Average gene length(bp)	Average CDS length(bp)	Average exons number per gene	Average exon length(bp)	Average intron length(bp)
NGS	25732	21596.8	2048.21	5.71	358.64	4149.47
PASA	24378	18750	2071.74	5.65	366.53	3584.91

## Sheet: Supplementary Table 7
Supplementary Table 7:Statistics of Protein-Coding Gene Annotations Based on De Novo Predictions
Gene set	Total number of genes	Average gene length(bp)	Average CDS length(bp)	Average exons number per gene	Average exon length(bp)	Average intron length(bp)
AUGUSTUS	37723	37112.1	1367.48	5.18	263.84	8545.22
GLIMMER	121770	34157.2	482.01	3.64	132.4	12752.5

## Sheet: Supplementary Table 8
Supplementary Table 8:Statistics of Transcriptome Support Rates for Predicted Genes
Sample	FPKM>0	Ratio	0<FPKM<0.1	Ratio	0.1<=FPKM<3.75	Ratio	3.75<=FPKM<15	Ratio	FPKM>=15	Ratio
A1	21444	0.6403	885	0.0264	6525	0.1948	6085	0.1817	7949	0.2374
B1	20660	0.6169	988	0.0295	6654	0.1987	5395	0.1611	7623	0.2276
CK1	20216	0.6037	746	0.0223	6110	0.1824	5832	0.1741	7528	0.2248
EL1	20992	0.6268	884	0.0264	6839	0.2042	6087	0.1818	7182	0.2145
GT4	21554	0.6436	989	0.0295	7696	0.2298	5585	0.1668	7284	0.2175
Jue	21417	0.6395	1324	0.0395	5885	0.1757	5815	0.1736	8393	0.2506
T01	22403	0.669	869	0.0259	7671	0.2291	6123	0.1828	7740	0.2311
T02	21253	0.6346	983	0.0294	8133	0.2429	5567	0.1662	6570	0.1962
T03	21901	0.654	947	0.0283	7081	0.2114	5667	0.1692	8206	0.245
UV1	20453	0.6107	682	0.0204	6848	0.2045	5592	0.167	7331	0.2189
WL1	20781	0.6205	1052	0.0314	7627	0.2277	5478	0.1636	6624	0.1978
Total Expressed Gene	25153	0.7511	-	-	-	-	-	-	-	-

## Sheet: Supplementary Table 9
Supplementary Table 9:Statistics of Gene Functional Annotation
Type		Number	Percent (%)
Annotation	Swissprot	18493	55.22
	KEGG	8726	26.06
	KOG	13162	39.3
	GO	13990	41.77
	NR	22258	66.46
Total	Annotated	22879	68.32
	Gene	33489	-

## Sheet: Supplementary Table 10
Supplementary Table 10:Statistics of Repeat Sequence Content in the Genome
Class	Order	Super family	Number of elements	Length of sequence(bp)	Percentage of sequence(%)
Class I			8175153	3454274358	78.1
	LTR		7987116	3309167317	74.82
		Gypsy	3846429	2403452327	54.35
		Unknown	271161	120493120	2.72
		Bel_Pao	853	95919	0
		Copia	1804322	785125951	17.75
	LINE		172711	142246739	3.22
		Unknown	4292	3856913	0.09
		L1	99039	85186634	1.93
		L2	4357	1883588	0.04
		RTE	62458	49119003	1.11
		CR1	2565	2200601	0.05
	SINE		15326	2860302	0.06
		Other	15326	2860302	0.06
Class II			828021	295649342	6.68
	DNA		799332	279657019	6.32
		CMC-EnSpm	179626	123263563	2.79
		Unknown	363861	99049870	2.24
		Sola	9672	6454815	0.15
		hAT-Tag1	58831	15685694	0.35
		hAT-Tip100	10030	8608747	0.19
		Other	177312	26594330	0.6
	RC		28689	15992323	0.36
		Helitron	28689	15992323	0.36
Total TEs			9003174	3749923700	84.78
Tandem Repeats			329041	19462331	0.44
	SSR		159958	1873786	0.04
	tandem_repeat		169083	17588545	0.4
Simple repeats			24937	3148112	0.07
Low complexity			24562	1969764	0.04
Other			8348	1718406	0.04
Total Repeats			9390062	3776222313	85.39
